# Supplementary material for: Magnetic Enrichment of SARS-CoV-2 Antigen-Binding B Cells for Analysis of Transcriptome and Antibody Repertoire
Source: MDPI journal article supplement (doi:10.3390/magnetochemistry8020023), 2022-02-05
Supplement: s1 [file s1]

## Article

# Magnetic Enrichment of SARS-CoV-2 Antigen-Binding B Cells for Analysis of Transcriptome and Antibody Repertoire

Maureen Banach <sup>1</sup>, Isaac T. W. Harley <sup>1,2,3</sup>, Mary K. McCarthy <sup>1</sup>, Cody Rester <sup>1</sup>, Adonis Stassinopoulos <sup>4</sup>, Ross M. Kedl <sup>1</sup>, Thomas E. Morrison <sup>1</sup> and John C. Cambier <sup>1,\*</sup>

**Citation:** Banach, M.; Harley, I.T.W.; McCarthy, M.K.; Rester, C.; Stassinopoulos, A.; Kedl, R.M.; Morrison, T.E.; Cambier, J.C. Magnetic Enrichment of SARS-CoV-2 Antigen-Binding B Cells for Analysis of Transcriptome and Antibody Repertoire. *Magnetochemistry* **2022**, *8*, 23. <https://doi.org/10.3390/magnetochemistry8020023>

Academic Editor: Marie Frenea-Robin

Received: 1 December 2021

Accepted: 20 December 2021

Published: 5 February 2022

**Publisher's Note:** MDPI stays neutral with regard to jurisdictional claims in published maps and institutional affiliations.

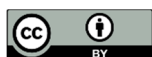

**Copyright:** © 2022 by the authors. Licensee MDPI, Basel, Switzerland. This article is an open access article distributed under the terms and conditions of the Creative Commons Attribution (CC BY) license (<https://creativecommons.org/licenses/by/4.0/>).

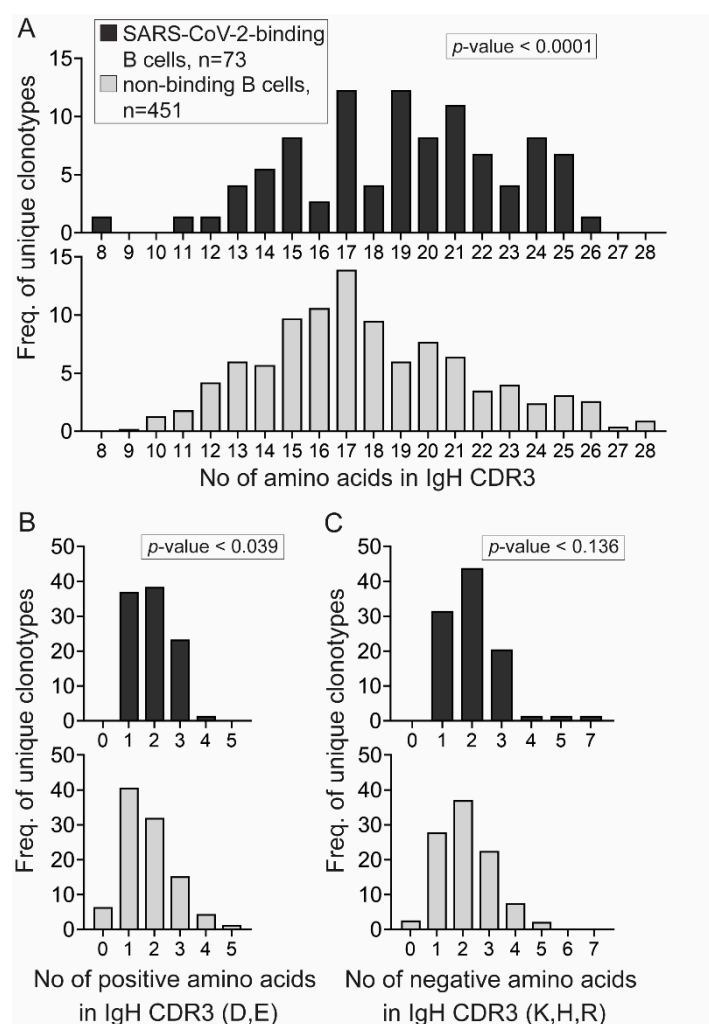

**Supplementary Figure S1. Characteristics of IgH CDR3 segment from SARS-CoV-2 antigen-binding B cells. (A)** Skewed length of IgH CDR3 segment in SARS-CoV-2 antigen-binding B cells compared to non-binding B cells. Non-binding B cells (median = 18, sum of ranks = 610), SARS-CoV-2 antigen-binding B cells (median = 3, sum of ranks = 293),  $p < 0.0001$ . **(B)** Composition of positively charged amino acid residues in heavy CDR3. Non-binding B cells (median = 49, sum of ranks = 52), SARS-CoV-2 antigen-binding B cells (median = 9, sum of ranks = 26),  $p < 0.039$ . **(C)** Composition of negatively charged amino acid residues in heavy CDR3. Non-binding B cells (median = 23, sum of ranks = 82.5), SARS-CoV-2 antigen-binding B cells (median = 1, sum of ranks = 53.5),  $p < 0.136$ . All tests were two-tailed Mann-Whitney U-test for similarity of distribution.

**Supplementary Table S1.** List of 45 out of 266 differentially and significantly expressed genes between SARS-CoV-2 antigen-binding B cells from seropositive donor 1 and non-binding B cells from seronegative donor.

| Gene name | Gene ID         | log <sub>2</sub> fold change | p-value               |
|-----------|-----------------|------------------------------|-----------------------|
| ARPC1B    | ENSG00000130429 | 3.8                          | $1.3 \times 10^{-19}$ |
| SELL      | ENSG00000188404 | 4.1                          | $6.9 \times 10^{-19}$ |
| UCP2      | ENSG00000175567 | 3.6                          | $6.5 \times 10^{-18}$ |
| ACTG1     | ENSG00000184009 | 3.6                          | $4.9 \times 10^{-17}$ |
| RAC2      | ENSG00000128340 | 3.2                          | $6.5 \times 10^{-15}$ |
| LSP1      | ENSG00000130592 | 3.2                          | $6.5 \times 10^{-15}$ |
| CD53      | ENSG00000143119 | 3.2                          | $3.8 \times 10^{-14}$ |
| OAZ1      | ENSG00000104904 | 2.9                          | $5.4 \times 10^{-14}$ |
| CNN2      | ENSG00000064666 | 2.8                          | $5.1 \times 10^{-13}$ |
| TKT       | ENSG00000163931 | 2.9                          | $1.1 \times 10^{-11}$ |
| CORO1A    | ENSG00000102879 | 2.5                          | $2.4 \times 10^{-11}$ |
| S100A10   | ENSG00000197747 | 2.8                          | $1.0 \times 10^{-10}$ |
| CAPZB     | ENSG00000077549 | 2.5                          | $2.6 \times 10^{-10}$ |
| PFN1      | ENSG00000108518 | 2.3                          | $3.2 \times 10^{-10}$ |
| ARHGDIB   | ENSG00000111348 | 2.4                          | $4.0 \times 10^{-10}$ |
| CD79B     | ENSG00000007312 | 2.6                          | $1.6 \times 10^{-9}$  |
| CLIC1     | ENSG00000213719 | 2.3                          | $3.5 \times 10^{-9}$  |
| ACTB      | ENSG00000075624 | 2.2                          | $6.1 \times 10^{-9}$  |
| SNHG5     | ENSG00000203875 | 2.3                          | $8.1 \times 10^{-9}$  |
| TMSB10    | ENSG00000034510 | 2.1                          | $1.5 \times 10^{-8}$  |
| TMSB4X    | ENSG00000205542 | 2.0                          | $3.8 \times 10^{-7}$  |
| GAPDH     | ENSG00000111640 | 1.9                          | $2.1 \times 10^{-6}$  |
| LTB       | ENSG00000227507 | 1.8                          | $2.4 \times 10^{-6}$  |
| MS4A1     | ENSG00000156738 | 1.9                          | $2.5 \times 10^{-6}$  |
| IER2      | ENSG00000160888 | 1.9                          | $5.3 \times 10^{-6}$  |
| PTPRCAP   | ENSG00000213402 | 1.8                          | $6.1 \times 10^{-6}$  |
| NCF1      | ENSG00000158517 | 1.9                          | $1.1 \times 10^{-5}$  |
| HLA-DQA1  | ENSG00000196735 | 1.7                          | $1.6 \times 10^{-5}$  |
| COTL1     | ENSG00000103187 | 1.9                          | $2.6 \times 10^{-5}$  |
| PRR13     | ENSG00000205352 | 1.7                          | $7.9 \times 10^{-5}$  |
| CRIP1     | ENSG00000213145 | 1.8                          | $9.3 \times 10^{-5}$  |
| ARPC3     | ENSG00000111229 | 1.6                          | $9.7 \times 10^{-5}$  |
| CFL1      | ENSG00000172757 | 1.6                          | $9.8 \times 10^{-5}$  |
| FCER2     | ENSG00000104921 | 1.7                          | $1.8 \times 10^{-4}$  |
| S100A4    | ENSG00000196154 | 2.2                          | $3.5 \times 10^{-4}$  |
| NME2      | ENSG00000243678 | 1.5                          | $5.0 \times 10^{-4}$  |
| MYL12A    | ENSG00000101608 | 1.5                          | $5.4 \times 10^{-4}$  |
| HLA-DMB   | ENSG00000242574 | 1.5                          | $6.4 \times 10^{-4}$  |
| GPSM3     | ENSG00000213654 | 1.5                          | $9.2 \times 10^{-4}$  |
| LY6E      | ENSG00000160932 | 1.5                          | $1.5 \times 10^{-3}$  |
| HLA-DRB5  | ENSG00000198502 | -2.1                         | $1.2 \times 10^{-3}$  |
| CXCR4     | ENSG00000121966 | -2.0                         | $1.3 \times 10^{-3}$  |
| FTH1      | ENSG00000167996 | -1.5                         | $1.1 \times 10^{-2}$  |

|         |                 |      |                      |
|---------|-----------------|------|----------------------|
| TSC22D3 | ENSG00000157514 | −1.6 | $2.2 \times 10^{-2}$ |
| CD83    | ENSG00000112149 | −1.5 | $4.0 \times 10^{-2}$ |

**Supplementary Table S2.** List of six out of 240 differentially and significantly expressed genes between SARS-CoV-2 antigen-binding B cells from seropositive donor 2 and non-binding B cells from seronegative donor.

| Gene name | Gene ID         | log <sub>2</sub> fold change | p-value              |
|-----------|-----------------|------------------------------|----------------------|
| G0S2      | ENSG00000123689 | 8.1                          | $4.6 \times 10^{-3}$ |
| ACTG1     | ENSG00000184009 | 1.9                          | $4.6 \times 10^{-3}$ |
| LYZ       | ENSG00000090382 | 6.9                          | $5.3 \times 10^{-3}$ |
| NEAT1     | ENSG00000245532 | 3.0                          | $8.9 \times 10^{-3}$ |
| S100A4    | ENSG00000196154 | 2.5                          | $2.1 \times 10^{-2}$ |
| TSC22D3   | ENSG00000157514 | −2.3                         | $4.2 \times 10^{-2}$ |

**Supplementary Table S3.** Thirty-five unique and unambiguous genes with significantly increased or decreased expression in B cell subcluster 1 and subcluster 3.

| Gene name | Gene ID         | subcluster 1                 |                       | subcluster 3                 |                       |
|-----------|-----------------|------------------------------|-----------------------|------------------------------|-----------------------|
|           |                 | log <sub>2</sub> fold change | p-value               | log <sub>2</sub> fold change | p-value               |
| ACTG1     | ENSG00000184009 | 2.8                          | $4.0 \times 10^{-15}$ | −2.4                         | $8.6 \times 10^{-10}$ |
| COTL1     | ENSG00000103187 | 2.0                          | $9.6 \times 10^{-10}$ | −2.0                         | $2.4 \times 10^{-8}$  |
| GAPDH     | ENSG00000111640 | 1.9                          | $2.1 \times 10^{-8}$  | −1.8                         | $3.0 \times 10^{-7}$  |
| PFN1      | ENSG00000108518 | 1.6                          | $1.1 \times 10^{-6}$  | −1.2                         | $1.2 \times 10^{-3}$  |
| ACTB      | ENSG00000075624 | 1.6                          | $2.3 \times 10^{-6}$  | −1.2                         | $1.4 \times 10^{-3}$  |
| ARHGDIB   | ENSG00000111348 | 1.5                          | $1.0 \times 10^{-5}$  | −0.9                         | $6.4 \times 10^{-2}$  |
| CORO1A    | ENSG00000102879 | 1.5                          | $1.1 \times 10^{-5}$  | −1.1                         | $6.7 \times 10^{-3}$  |
| CRIP1     | ENSG00000213145 | 1.5                          | $5.6 \times 10^{-5}$  | −0.9                         | $9.1 \times 10^{-2}$  |
| TMSB10    | ENSG00000034510 | 1.4                          | $6.9 \times 10^{-5}$  | −0.8                         | $9.8 \times 10^{-2}$  |
| CLIC1     | ENSG00000213719 | 1.4                          | $1.3 \times 10^{-4}$  | −1.0                         | $2.4 \times 10^{-2}$  |
| TMSB4X    | ENSG00000205542 | 1.3                          | $3.1 \times 10^{-4}$  | −0.8                         | $8.1 \times 10^{-2}$  |
| MS4A1     | ENSG00000156738 | 1.2                          | $2.0 \times 10^{-3}$  | −0.4                         | $8.1 \times 10^{-1}$  |
| PTPRCAP   | ENSG00000213402 | 1.2                          | $1.9 \times 10^{-3}$  | −0.8                         | $1.2 \times 10^{-1}$  |
| NME2      | ENSG00000243678 | 1.1                          | $4.4 \times 10^{-3}$  | −1.0                         | $1.6 \times 10^{-2}$  |
| LTB       | ENSG00000227507 | 1.1                          | $5.4 \times 10^{-3}$  | −1.0                         | $2.0 \times 10^{-2}$  |
| CFL1      | ENSG00000172757 | 1.1                          | $5.3 \times 10^{-3}$  | −0.8                         | $7.9 \times 10^{-2}$  |
| MEF2C     | ENSG00000081189 | 1.1                          | $7.8 \times 10^{-3}$  | −0.6                         | $5.4 \times 10^{-1}$  |
| MIF       | ENSG00000240972 | 1.0                          | $1.0 \times 10^{-2}$  | −0.6                         | $3.8 \times 10^{-1}$  |
| SH3BGRL3  | ENSG00000142669 | 1.0                          | $1.5 \times 10^{-2}$  | −0.6                         | $4.5 \times 10^{-1}$  |
| ARPC2     | ENSG00000163466 | 0.9                          | $2.3 \times 10^{-2}$  | −0.6                         | $4.7 \times 10^{-1}$  |
| YWHAB     | ENSG00000166913 | 0.9                          | $3.1 \times 10^{-2}$  | −0.5                         | $6.2 \times 10^{-1}$  |
| PSME1     | ENSG00000092010 | 0.9                          | $4.4 \times 10^{-2}$  | −0.7                         | $2.9 \times 10^{-1}$  |
| SMCHD1    | ENSG00000101596 | −0.5                         | $5.6 \times 10^{-1}$  | 1.0                          | $1.9 \times 10^{-2}$  |
| PPP1R15A  | ENSG00000087074 | −0.7                         | $2.9 \times 10^{-1}$  | 1.0                          | $2.7 \times 10^{-2}$  |

---

|         |                 |      |                      |     |                      |
|---------|-----------------|------|----------------------|-----|----------------------|
| JUN     | ENSG00000177606 | −0.8 | $1.6 \times 10^{-1}$ | 1.1 | $8.9 \times 10^{-3}$ |
| FOXP1   | ENSG00000114861 | −0.9 | $7.5 \times 10^{-2}$ | 1.0 | $1.3 \times 10^{-2}$ |
| BTG1    | ENSG00000133639 | −1.0 | $4.7 \times 10^{-2}$ | 1.1 | $3.8 \times 10^{-3}$ |
| EIF1B   | ENSG00000114784 | −1.0 | $4.2 \times 10^{-2}$ | 0.8 | $1.0 \times 10^{-1}$ |
| CD69    | ENSG00000110848 | −1.1 | $2.5 \times 10^{-2}$ | 1.3 | $5.3 \times 10^{-4}$ |
| CD83    | ENSG00000112149 | −1.2 | $1.0 \times 10^{-2}$ | 1.0 | $1.2 \times 10^{-2}$ |
| DUSP1   | ENSG00000120129 | −1.2 | $7.9 \times 10^{-3}$ | 1.3 | $8.2 \times 10^{-4}$ |
| TSC22D3 | ENSG00000157514 | −1.3 | $4.0 \times 10^{-3}$ | 1.2 | $1.8 \times 10^{-3}$ |
| FTH1    | ENSG00000167996 | −1.5 | $3.4 \times 10^{-4}$ | 1.0 | $1.5 \times 10^{-2}$ |
| CXCR4   | ENSG00000121966 | −1.6 | $9.4 \times 10^{-5}$ | 1.2 | $1.8 \times 10^{-3}$ |
| FOS     | ENSG00000170345 | −1.9 | $4.1 \times 10^{-5}$ | 2.1 | $1.6 \times 10^{-8}$ |

---
